# Supplementary material for: Radiation dose enhancement using gold nanoparticles with a diamond linear accelerator target: a multiple cell type analysis
Source: PubMed Central journal article supplement (PMC8799734; doi:10.1038/s41598-022-05339-z), 2022-01-28
Supplement: 41598_2022_5339_MOESM1_ESM.pdf [file 41598_2022_5339_MOESM1_ESM.pdf]

Supplemental Figures for

**Radiation dose enhancement using gold nanoparticles with a diamond linear accelerator target - A multiple cell type analysis**

**Olivia Piccolo, John D. Lincoln, Nicole Melong, Benno C. Orr, Nicholas R. Fernandez,  
Jennifer Borsavage, Jason N. Berman, James Robar, Michael N. Ha**

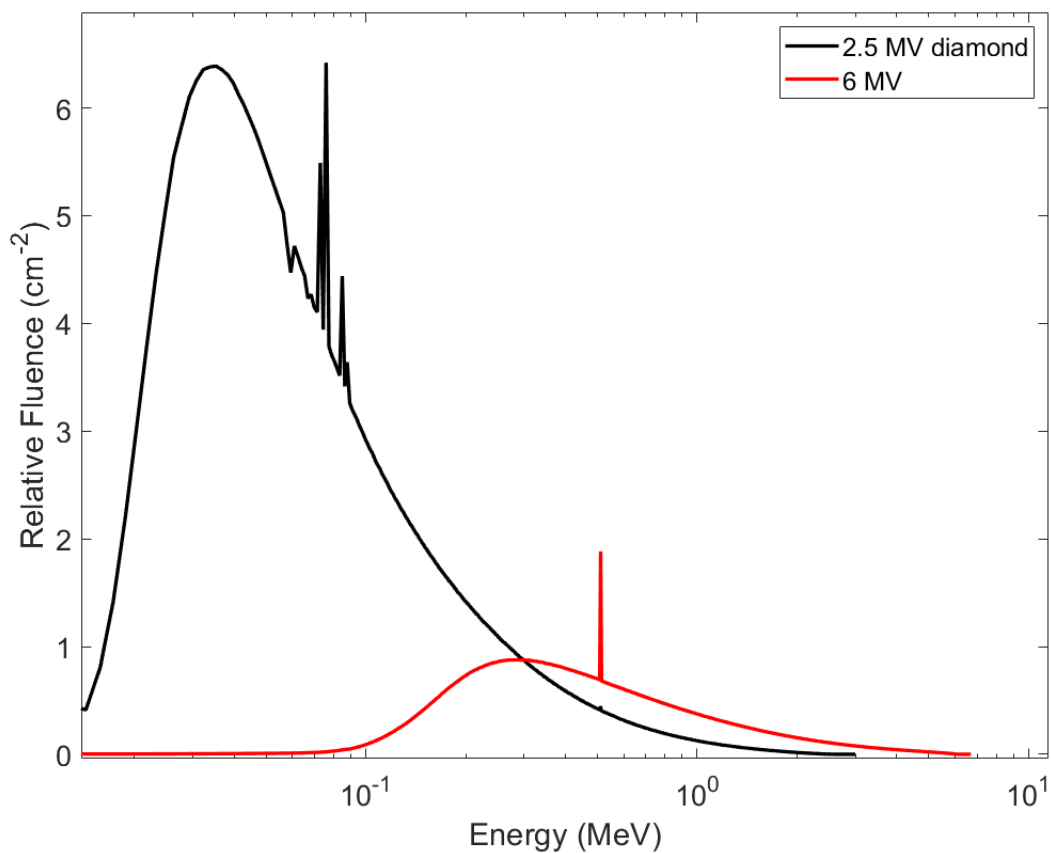

**Supplemental Figure S1. Comparison between 2.5 MV diamond and 6 MV standard therapeutic energy spectra, demonstrating increased content of low-energy photons in the diamond target beam.**

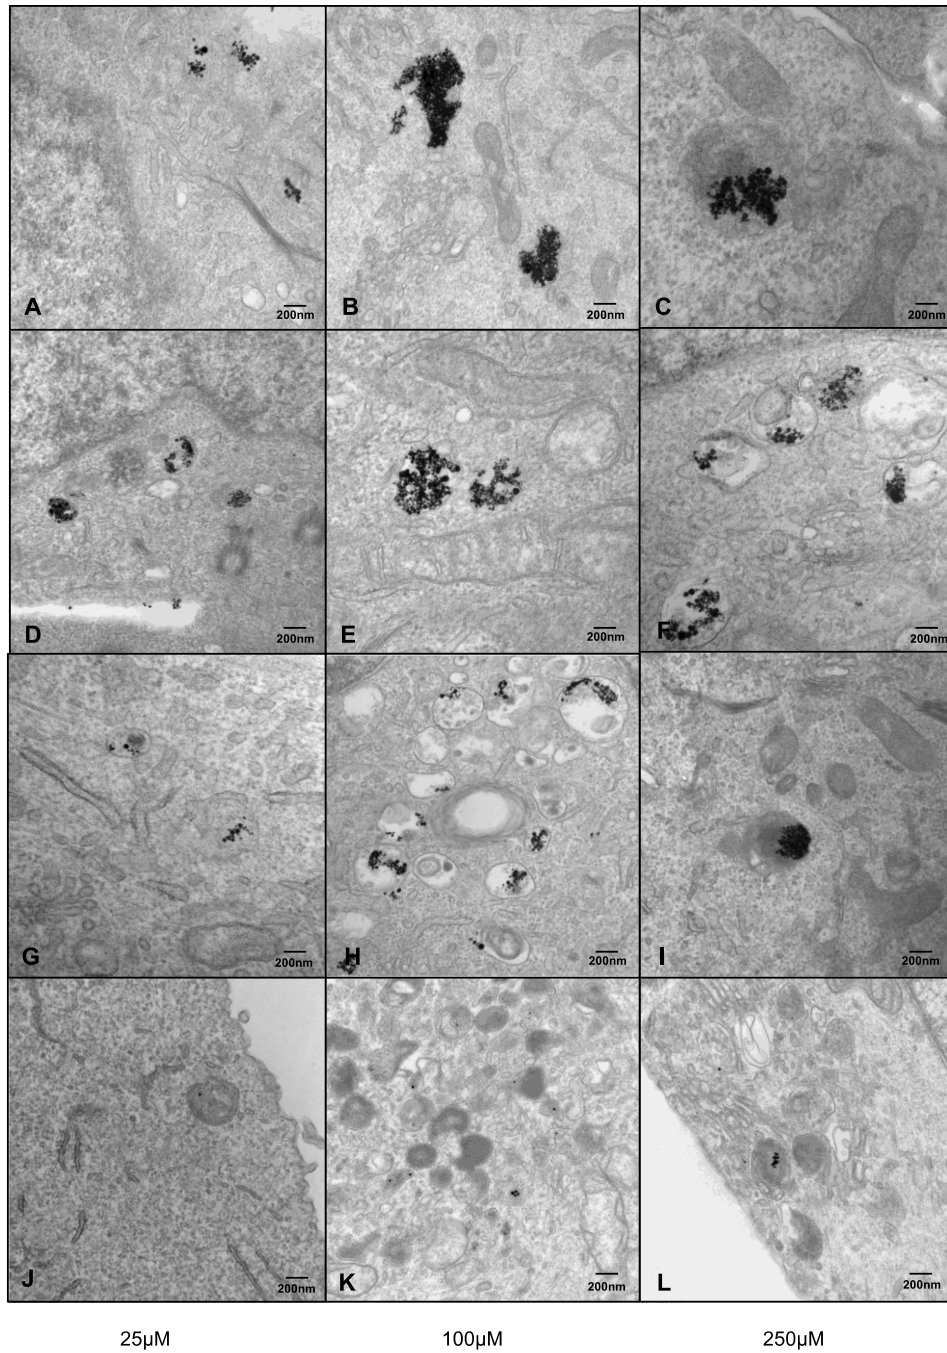

**Supplemental Figure S2. GNP uptake in cell lysosomes increases with higher concentrations of GNPs in HNCs.** Representative images of **a)-c)** FaDu hypopharyngeal carcinoma cells; **d)-f)** HSC-3 hypopharyngeal carcinoma cells; **g)-i)** Detroit-562 pharyngeal carcinoma cells; and **j)-l)** Panc1 pancreatic adenocarcinoma cells labelled (from left to right) with 25  $\mu\text{M}$ , 100  $\mu\text{M}$ , and 250  $\mu\text{M}$  GNPs. Cells were fixed ~36 hours after labelling with GNPs (approximate radiation timepoint) and images were captured with a transmission electron microscope (TEM). Acronym(s): GNP(s)- gold nanoparticle(s); HNC- head and neck cancer cell.

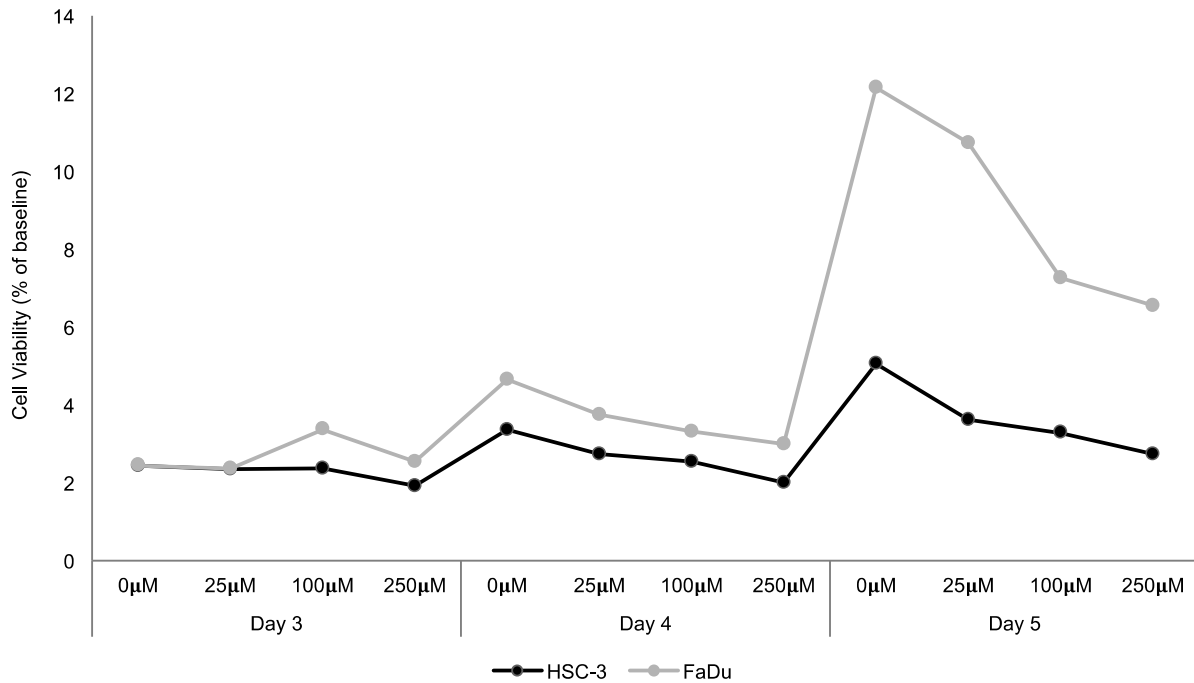

**Supplemental Figure S3. GNPs decrease cell viability at higher concentrations.** The Alamarblue viability assay was used to determine the levels of oxidative phosphorylation in FaDu and HSC-3 cells labelled with increasing concentrations of GNPs. The fluorescent output of metabolically active cells was recorded after 24 h incubation with GNPs and cell viability was measured from days 3 to 5 after the baseline assessment. Viability of HSC-3 cells was significantly hindered at 5 days with 100  $\mu\text{M}$  and 250  $\mu\text{M}$  GNPs ( $p=0.022$  and  $p=0.009$ , respectively). Cell viability values were made relative to baseline cells and are presented as the fold change means  $\pm$  standard error of the mean. Significance between groups was tested using two-way analysis of variance (ANOVA) with a Tukey pairwise multiple comparisons test ( $n=3$ ; 10 wells per group/replicate). Acronym(s): GNPs- gold nanoparticles.

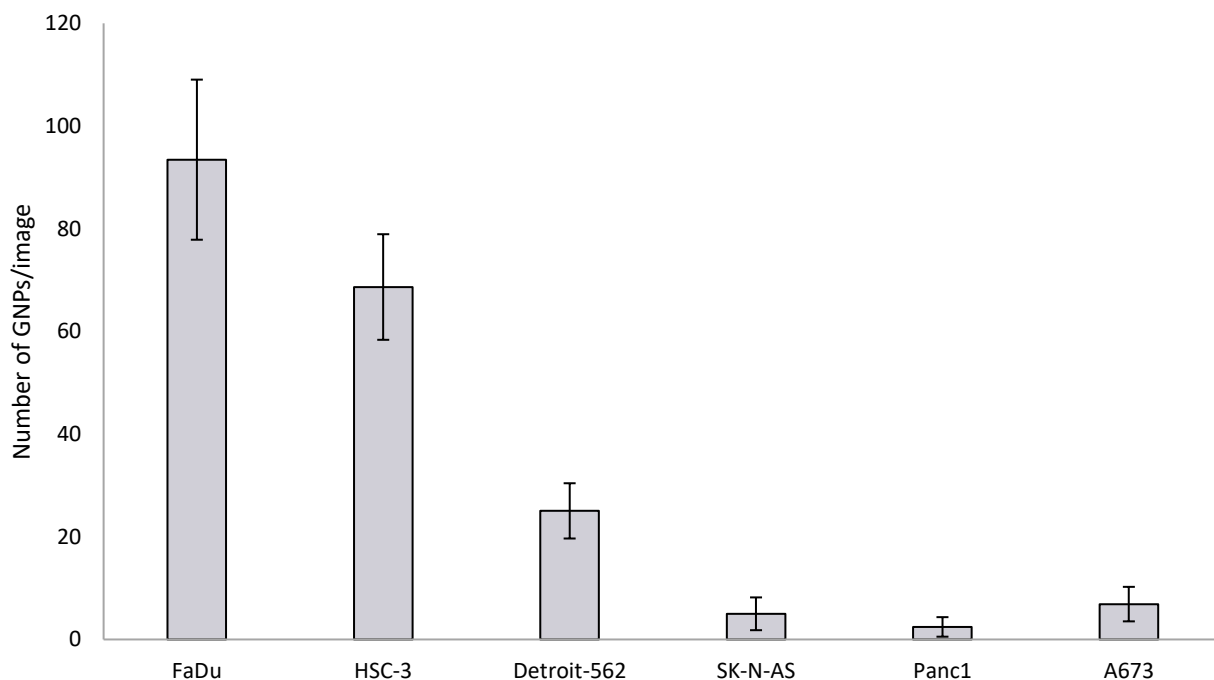

**Supplemental figure S4. Diffusion of GNPs was highest in HNCC lines.** Transmission Electron Microscope (TEM) images were taken of FaDu, HSC-3, Detroit-562, SK-N-AS, Panc1, and A673 cells labelled with 25  $\mu$ M GNPs (n=45 for each cell line). Imaging was done in triplicate – 5 images were captured for each sample, with 3 samples of each cell line/replicate, and 3 replicates in total. Total number of GNPs was counted for each image, and the average number of GNPs in each image was calculated. Acronym(s): HNCC – head and neck cancer cell; GNPs- gold nanoparticles.

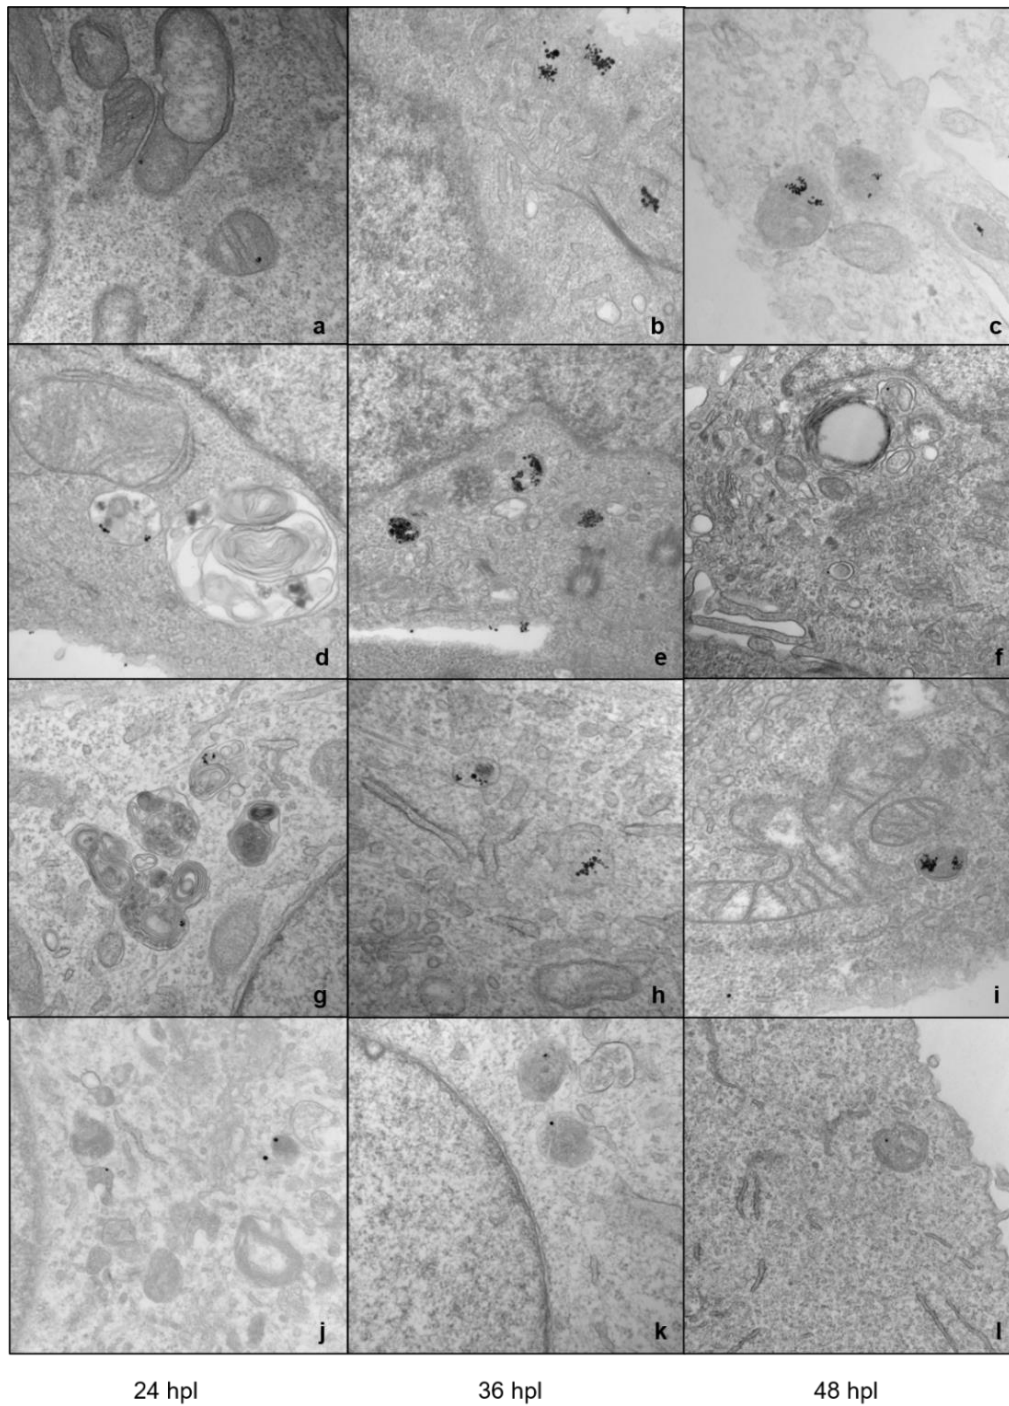

**Supplemental Figure S5. GNPs diffuse into cell lines at 24 hours post-labelling and demonstrate retention in cells 48 hours post-labelling.** Representative images of a)-c) FaDu hypopharyngeal carcinoma cells; d)-f) HSC-3 hypopharyngeal carcinoma cells; g)-i) Detroit-562 pharyngeal carcinoma cells; and j)-l) Panc1 pancreatic adenocarcinoma cells imaged (from left to right) at 24, 36, and 48 hpl. Cells were fixed at appropriate timepoint and images were captured with a transmission electron microscope (TEM). Acronym(s): GNPs- gold nanoparticles; hpl- hours post labelling.

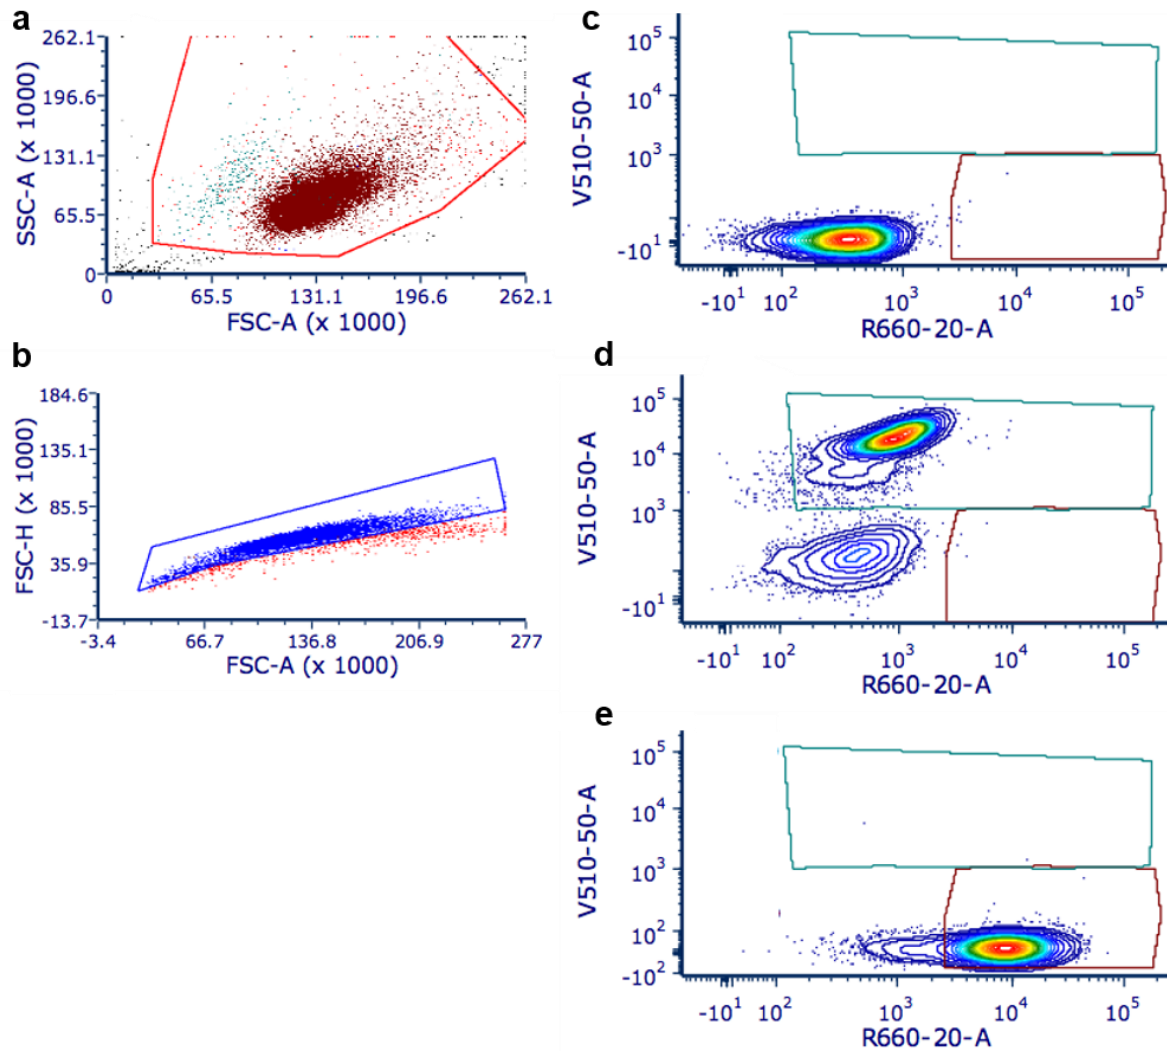

**Supplemental Figure S6. Flow cytometry gating strategies for the detection of ROS and cell death.** **a)** General gating strategy to identify living and dead cells in sample and eliminate cell debris. **b)** Doublet discrimination gating strategy. **c)** Unstained control cells. **d)** Gating strategy to identify SYTOX + dead cells, representative plot from heat-killed SYTOX + control cells. **e)** Gating strategy to identify CellROX + cells, representative plot from cells treated with tert-butyl hydrogen peroxide to produce reactive oxygen species. Acronym(s): ROS- reactive oxygen species.
